# Supplementary material for: Verification of the Reliability and Validity of the Short Form 36 Scale in Indonesian Middle-aged and Older Adults
Source: PubMed Central journal article supplement — J Prev Med Public Health. 2020 Apr 14;53(3):180–8. doi: 10.3961/jpmph.19.324 (PMC7280813; doi:10.3961/jpmph.19.324), 2020-04-14
Supplement: jpmph-53-3-180-suppl1.pdf [file jpmph-53-3-180-suppl1.pdf]

## Supplementary Tables

**Supplementary Table 1. The SF-36 factor structure with the number of response options**

| <b>Component summary</b>              | <b>Subscales</b> | <b>Number of items<br/>(items)</b> | <b>Number of response<br/>options</b> |
|---------------------------------------|------------------|------------------------------------|---------------------------------------|
| <b>Physical component<br/>summary</b> | Physical health  | 10 items (3a-3j)                   | 3                                     |
|                                       | Role physical    | 4 items (4a-4d)                    | 2                                     |
|                                       | Bodily pain      | 2 items (7, 8)                     | 5 (item 7), 6 (item 8)                |
|                                       | General health   | 5 items (1, 11a-11d)               | 5                                     |
| <b>Mental component<br/>summary</b>   | Vitality         | 4 items (9a, 9e, 9g, 9i)           | 6                                     |
|                                       | Role emotion     | 3 items (5a-5c)                    | 2                                     |
|                                       | Mental health    | 5 items (9b,9c,9d,9f,9h)           | 6                                     |
|                                       | Social function  | 2 items (6, 10)                    | 5                                     |
