# Supplementary material for: Verification of the Reliability and Validity of the Short Form 36 Scale in Indonesian Middle-aged and Older Adults
Source: PubMed Central journal article supplement — J Prev Med Public Health. 2020 Apr 14;53(3):180–8. doi: 10.3961/jpmph.19.324 (PMC7280813; doi:10.3961/jpmph.19.324), 2020-04-14
Supplement: jpmph-53-3-180-suppl2.pdf [file jpmph-53-3-180-suppl2.pdf]

**Supplementary Table 2. Summary of item-scale assumptions assessments (n=206)**

| Item                                         | Equivalency |       | Corrected<br>item-<br>subscale<br>correlation | Floor/Ceiling |              | Item-subscale correlation |       |       |       |      |      |      |      |
|----------------------------------------------|-------------|-------|-----------------------------------------------|---------------|--------------|---------------------------|-------|-------|-------|------|------|------|------|
|                                              | Mean        | SD    |                                               | Floor<br>%    | Ceiling<br>% | PF                        | RP    | BP    | GH    | VT   | RE   | MH   | SF   |
| <b>Physical function (PF) subscale items</b> |             |       |                                               |               |              |                           |       |       |       |      |      |      |      |
| <b>3a</b>                                    | 48.30       | 36.42 | 0.33**                                        | 18            | 25           | 0.47*                     | 0.22  | 0.32  | 0.23  | 0.13 | 0.20 | 0.04 | 0.21 |
| <b>3b</b>                                    | 84.95       | 29.08 | 0.68                                          | 6             | 76           | 0.75*                     | 0.33  | 0.41  | 0.44  | 0.25 | 0.17 | 0.30 | 0.43 |
| <b>3c</b>                                    | 81.55       | 30.44 | 0.70                                          | 7             | 70           | 0.77*                     | 0.43  | 0.43  | 0.49  | 0.29 | 0.29 | 0.33 | 0.46 |
| <b>3d</b>                                    | 64.32       | 34.94 | 0.61                                          | 14            | 43           | 0.70*                     | 0.42  | 0.41  | 0.44  | 0.37 | 0.34 | 0.31 | 0.28 |
| <b>3e</b>                                    | 83.74       | 30.69 | 0.65                                          | 8             | 75           | 0.73*                     | 0.43  | 0.42  | 0.46  | 0.41 | 0.29 | 0.36 | 0.35 |
| <b>3f</b>                                    | 75.00       | 31.91 | 0.68                                          | 8             | 58           | 0.75*                     | 0.28  | 0.39  | 0.45  | 0.31 | 0.24 | 0.31 | 0.37 |
| <b>3g</b>                                    | 69.17       | 37.40 | 0.67                                          | 16            | 54           | 0.76*                     | 0.38  | 0.24  | 0.41  | 0.20 | 0.27 | 0.26 | 0.16 |
| <b>3h</b>                                    | 76.46       | 32.63 | 0.72                                          | 9             | 62           | 0.79*                     | 0.43  | 0.30  | 0.45  | 0.22 | 0.29 | 0.24 | 0.31 |
| <b>3i</b>                                    | 82.52       | 31.40 | 0.65                                          | 8             | 73           | 0.73*                     | 0.37  | 0.24  | 0.43  | 0.21 | 0.29 | 0.33 | 0.27 |
| <b>3j</b>                                    | 91.50       | 24.95 | 0.54                                          | 5             | 88           | 0.61*                     | 0.28  | 0.26  | 0.37  | 0.27 | 0.18 | 0.35 | 0.30 |
| <b>Role physical (RP) subscale items</b>     |             |       |                                               |               |              |                           |       |       |       |      |      |      |      |
| <b>4a</b>                                    | 64.56       | 47.95 | 0.66                                          | 35            | 65           | 0.40                      | 0.81* | 0.38  | 0.31  | 0.16 | 0.50 | 0.18 | 0.34 |
| <b>4b</b>                                    | 63.11       | 48.37 | 0.69                                          | 37            | 63           | 0.37                      | 0.83* | 0.39  | 0.41  | 0.15 | 0.47 | 0.16 | 0.35 |
| <b>4c</b>                                    | 60.68       | 48.97 | 0.74                                          | 39            | 61           | 0.47                      | 0.86* | 0.44  | 0.41  | 0.24 | 0.40 | 0.21 | 0.35 |
| <b>4d</b>                                    | 56.31       | 49.72 | 0.64                                          | 44            | 56           | 0.44                      | 0.80* | 0.40  | 0.36  | 0.24 | 0.45 | 0.19 | 0.35 |
| <b>Bodily pain (BP) subscale items</b>       |             |       |                                               |               |              |                           |       |       |       |      |      |      |      |
| <b>7</b>                                     | 69.61       | 23.27 | 0.57                                          | 2             | 19           | 0.50                      | 0.47  | 0.89* | 0.40  | 0.31 | 0.37 | 0.30 | 0.48 |
| <b>8</b>                                     | 82.52       | 21.90 | 0.57                                          | 1             | 51           | 0.35                      | 0.39  | 0.88* | 0.26  | 0.31 | 0.25 | 0.27 | 0.43 |
| <b>General health (GH) subscale items</b>    |             |       |                                               |               |              |                           |       |       |       |      |      |      |      |
| <b>1</b>                                     | 40.90       | 18.94 | 0.34**                                        | 5             | 1            | 0.41                      | 0.34  | 0.35  | 0.52* | 0.32 | 0.32 | 0.28 | 0.23 |

|                                                     |       |       |        |    |    |       |       |       |       |       |       |       |       |
|-----------------------------------------------------|-------|-------|--------|----|----|-------|-------|-------|-------|-------|-------|-------|-------|
| <b>11a</b>                                          | 67.23 | 30.75 | 0.54   | 5  | 34 | 0.41  | 0.44  | 0.25  | 0.76* | 0.31  | 0.34  | 0.35  | 0.34  |
| <b>11b</b>                                          | 70.02 | 26.41 | 0.42   | 3  | 28 | 0.40  | 0.15  | 0.21  | 0.64* | 0.24  | 0.20  | 0.29  | 0.27  |
| <b>11c</b>                                          | 71.60 | 29.12 | 0.55   | 3  | 42 | 0.49  | 0.34  | 0.29  | 0.75* | 0.30  | 0.28  | 0.47  | 0.35  |
| <b>11d</b>                                          | 71.36 | 24.42 | 0.60   | 3  | 24 | 0.32  | 0.29  | 0.23  | 0.76* | 0.35  | 0.31  | 0.45  | 0.50  |
| <b>Vitality (VT) subscale items</b>                 |       |       |        |    |    |       |       |       |       |       |       |       |       |
| <b>9a</b>                                           | 69.71 | 28.33 | 0.56   | 3  | 29 | 0.31  | 0.14  | 0.24  | 0.31  | 0.78* | 0.19  | 0.57  | 0.27  |
| <b>9e</b>                                           | 62.62 | 27.71 | 0.43   | 4  | 18 | 0.26  | 0.16  | 0.25  | 0.34  | 0.69* | 0.20  | 0.45  | 0.31  |
| <b>9g</b>                                           | 68.64 | 29.58 | 0.48   | 8  | 28 | 0.22  | 0.15  | 0.19  | 0.25  | 0.74* | 0.11  | 0.35  | 0.23  |
| <b>9i</b>                                           | 62.72 | 22.53 | 0.55   | 2  | 12 | 0.31  | 0.26  | 0.36  | 0.40  | 0.73* | 0.21  | 0.55  | 0.39  |
| <b>Role emotion (RE) limitation subscale items</b>  |       |       |        |    |    |       |       |       |       |       |       |       |       |
| <b>5a</b>                                           | 64.08 | 48.09 | 0.75   | 36 | 64 | 0.32  | 0.52  | 0.26  | 0.35  | 0.20  | 0.89* | 0.14  | 0.33  |
| <b>5b</b>                                           | 65.05 | 47.80 | 0.70   | 35 | 65 | 0.30  | 0.46  | 0.36  | 0.41  | 0.26  | 0.87* | 0.16  | 0.35  |
| <b>5c</b>                                           | 61.65 | 48.74 | 0.73   | 38 | 62 | 0.35  | 0.48  | 0.31  | 0.33  | 0.17  | 0.88* | 0.20  | 0.32  |
| <b>Mental health (MH) limitation subscale items</b> |       |       |        |    |    |       |       |       |       |       |       |       |       |
| <b>9b</b>                                           | 75.73 | 23.73 | 0.48   | 1  | 33 | 0.36  | 0.21  | 0.29  | 0.43  | 0.33  | 0.13  | 0.68* | 0.35  |
| <b>9c</b>                                           | 78.06 | 27.37 | 0.56   | 4  | 44 | 0.36  | 0.28  | 0.28  | 0.43  | 0.61  | 0.12  | 0.76* | 0.44  |
| <b>9d</b>                                           | 76.41 | 24.29 | 0.49   | 2  | 34 | 0.30  | 0.10  | 0.29  | 0.39  | 0.47  | 0.18  | 0.69* | 0.31  |
| <b>9f</b>                                           | 73.59 | 22.47 | 0.61   | 1  | 25 | 0.42  | 0.24  | 0.31  | 0.48  | 0.54  | 0.19  | 0.76* | 0.43  |
| <b>9h</b>                                           | 73.59 | 27.69 | 0.31** | 5  | 34 | -0.03 | -0.03 | -0.01 | 0.15  | 0.28  | 0.06  | 0.58* | 0.15  |
| <b>Social function (SF) subscale items</b>          |       |       |        |    |    |       |       |       |       |       |       |       |       |
| <b>6</b>                                            | 87.62 | 22.46 | 0.55   | 2  | 69 | 0.50  | 0.40  | 0.48  | 0.52  | 0.48  | 0.34  | 0.58  | 0.88* |
| <b>10</b>                                           | 82.77 | 22.91 | 0.55   | 1  | 56 | 0.27  | 0.34  | 0.42  | 0.34  | 0.23  | 0.32  | 0.26  | 0.88* |

\*highest corrected item-scale correlation

\*\* lower than 0.40
