# Supplementary material for: Verification of the Reliability and Validity of the Short Form 36 Scale in Indonesian Middle-aged and Older Adults
Source: PubMed Central journal article supplement — J Prev Med Public Health. 2020 Apr 14;53(3):180–8. doi: 10.3961/jpmph.19.324 (PMC7280813; doi:10.3961/jpmph.19.324), 2020-04-14
Supplement: jpmph-53-3-180-suppl3.pdf [file jpmph-53-3-180-suppl3.pdf]

**Supplementary Table 3. T-values and standardized solutions of the hypothesized (n=206)**

**structure**

| <b>Item</b> | <b>Subscale</b> | <b>T-value</b> | <b>Standardized solution</b> | <b>R<sup>2</sup></b> |
|-------------|-----------------|----------------|------------------------------|----------------------|
| 3a          | PF              | 8.94           | 0.04*                        | 0.00                 |
| 3b          | PF              | 9.87           | 0.75                         | 0.56                 |
| 3c          | PF              | 10.5           | 0.79                         | 0.62                 |
| 3d          | PF              | 8.98           | 0.69                         | 0.47                 |
| 3e          | PF              | 9.87           | 0.75                         | 0.56                 |
| 3f          | PF              | 9.55           | 0.73                         | 0.53                 |
| 3g          | PF              | 9.48           | 0.72                         | 0.52                 |
| 3h          | PF              | 10.15          | 0.76                         | 0.58                 |
| 3i          | PF              | 10.16          | 0.76                         | 0.58                 |
| 3j          | PF              | 8.57           | 0.66                         | 0.44                 |
| 4a          | RP              | 7.98           | 0.66                         | 0.43                 |
| 4b          | RP              | 7.65           | 0.71                         | 0.50                 |
| 4a          | RP              | 8.02           | 0.75                         | 0.56                 |
| 4d          | RP              | 7.28           | 0.66                         | 0.44                 |
| 7           | BP              | 7.77           | 0.69                         | 0.48                 |
| 8           | BP              | 6.26           | 0.55                         | 0.30                 |
| 1           | GH              | 8.93           | 0.07*                        | 0.01                 |
| 11a         | GH              | 7.49           | 0.69                         | 0.48                 |
| 11b         | GH              | 5.73           | 0.52                         | 0.27                 |
| 11c         | GH              | 7.42           | 0.69                         | 0.47                 |
| 11d         | GH              | 7.08           | 0.65                         | 0.42                 |
| 9a          | VT              | 8.94           | 0.70                         | 0.50                 |
| 9e          | VT              | 4.23           | 0.48                         | 0.23                 |
| 9i          | VT              | 4.82           | 0.73                         | 0.54                 |
| 9g          | VT              | 9g             | 0.67                         | 0.58                 |
| 5a          | RE              | 8.94           | 0.07                         | 0.01                 |
| 5b          | RE              | 7.44           | 0.82                         | 0.68                 |
| 5c          | RE              | 7.49           | 0.77                         | 0.59                 |
| 9d          | MH              | 5.8            | 0.57                         | 0.32                 |
| 9c          | MH              | 6.72           | 0.70                         | 0.49                 |
| 9f          | MH              | 6.74           | 0.70                         | 0.49                 |
| 9h          | MH              | 2.63           | 0.07*                        | 0.01                 |
| 9b          | MH              | 8.26           | 0.58                         | 0.34                 |
| 10          | SF              | 5.86           | 0.68                         | 0.50                 |
| 6           | SF              | 6.41           | 0.81                         | 0.65                 |

PF: Physical Function, RP: Role Physical, BP: Bodily pain, GH: General health, VT: Vitality, RE: Role Emotion, MH: Mental Health, SF: Social Functioning

\* Poor factor loading for item 1, 3a and 9h
