# Supplementary material for: Verification of the Reliability and Validity of the Short Form 36 Scale in Indonesian Middle-aged and Older Adults
Source: PubMed Central journal article supplement — J Prev Med Public Health. 2020 Apr 14;53(3):180–8. doi: 10.3961/jpmph.19.324 (PMC7280813; doi:10.3961/jpmph.19.324), 2020-04-14
Supplement: jpmph-53-3-180-suppl4.pdf [file jpmph-53-3-180-suppl4.pdf]

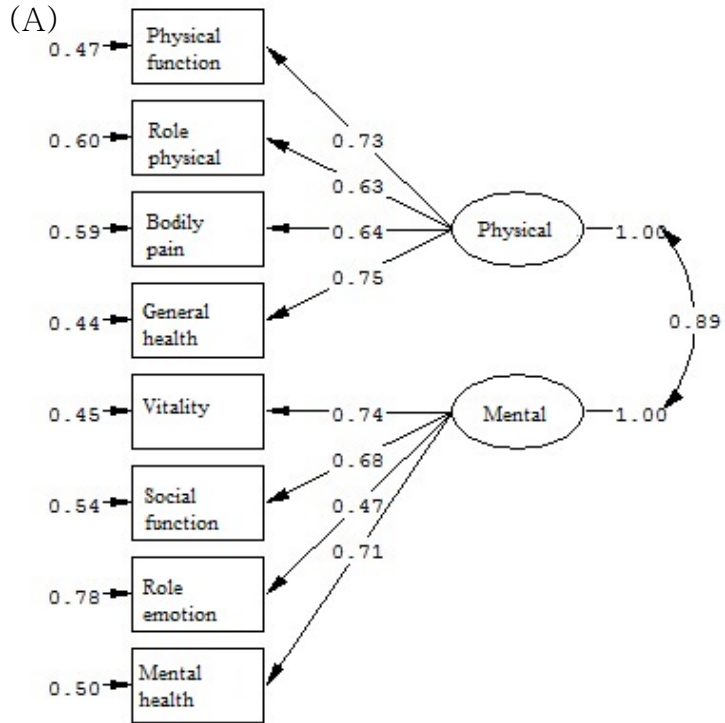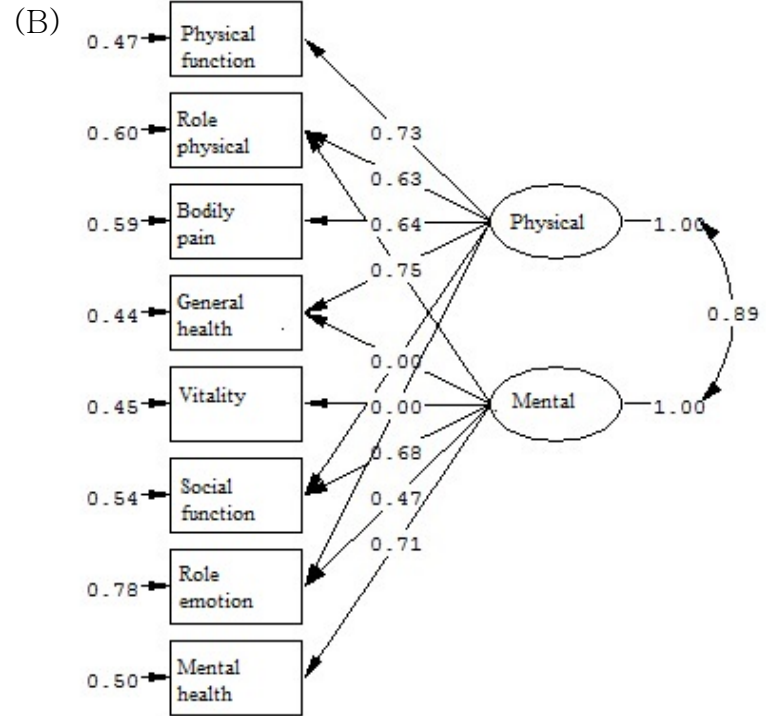

**Supplemental Material 4.** The second-order (A) original and (B) modified structures with the standardized coefficient.
